# Supplementary material for: Behaviour of Vascular Smooth Muscle Cells on Amine Plasma-Coated Materials with Various Chemical Structures and Morphologies
Source: PubMed Central journal article supplement (PMC7763571; doi:10.3390/ijms21249467), 2020-12-12
Supplement: ijms-21-09467-s001.pdf [file ijms-21-09467-s001.pdf]

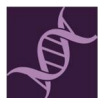

Supplementary Materials

# Behaviour of Vascular Smooth Muscle Cells on Amine Plasma-Coated Materials with Various Chemical Structures and Morphologies

Ivana Nemcakova <sup>1\*</sup>, Lucie Blahova <sup>2</sup> Petr Rysanek <sup>3</sup>, Andreu Blanquer <sup>1</sup>, Lucie Bacakova <sup>1</sup> and Lenka Zajíčková <sup>2, 4, 5</sup>

- <sup>1</sup> Laboratory of Biomaterials and Tissue Engineering, Institute of Physiology of the Czech Academy of Sciences, v.v.i., Videnska 1083, 142 20 Prague 4, Czech Republic; Andreu.BlanquerJerez@fgu.cas.cz (A.B.); lucie.bacakova@fgu.cas.cz (L.B.)
  - <sup>2</sup> Central European Institute of Technology—CEITEC, Masaryk University, Kamenice 5, 625 00 Brno, Czech Republic; lucie.blahova@ceitec.muni.cz (L.B.); lenkaz@physics.muni.cz (L.Z.)
  - <sup>3</sup> Department of Physics, Faculty of Science, University of J. E. Purkyne in Usti nad Labem, Pasteurova 15, 400 96 Usti nad Labem, Czech Republic; petr.rysanek@ujep.cz
  - <sup>4</sup> Department of Physical Electronics, Faculty of Science, Masaryk University, Kotlarska 2, 61137 Brno, Czech Republic
  - <sup>5</sup> Central European Institute of Technology—CEITEC, Brno University of Technology, Purkynova 123, 612 00 Brno, Czech Republic
- \* Correspondence: ivana.nemcakova@fgu.cas.cz

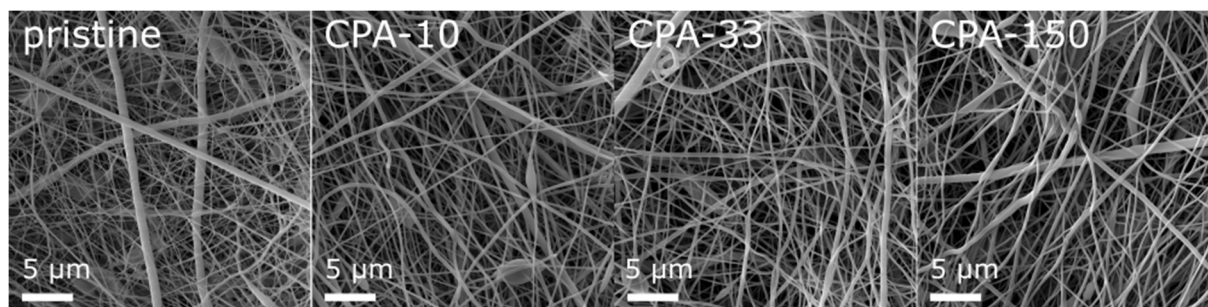

**Figure S1.** Micrographs of pristine and coated PCL NFs. CPA-10, CPA-33, CPA-150: PPs were deposited at the average RF power ( $P_{av}$ ) of 10, 33, and 150 W, respectively.

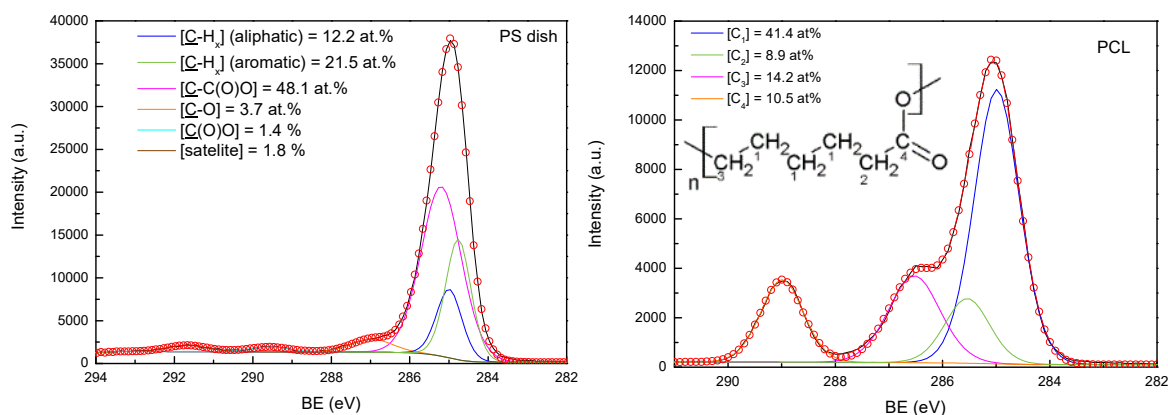

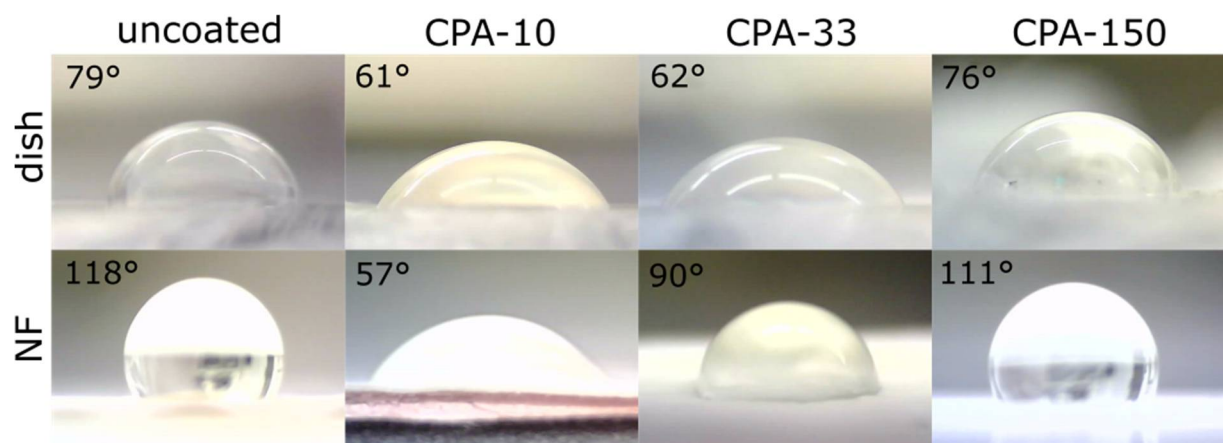

**Figure S3.** Shape of water droplets on uncoated and PP-coated PS dishes and PCL NFs aged two weeks with measured water contact angles. CPA-10, CPA-33, CPA-150: PPs were deposited at the average RF power ( $P_{av}$ ) of 10, 33, and 150 W, respectively.



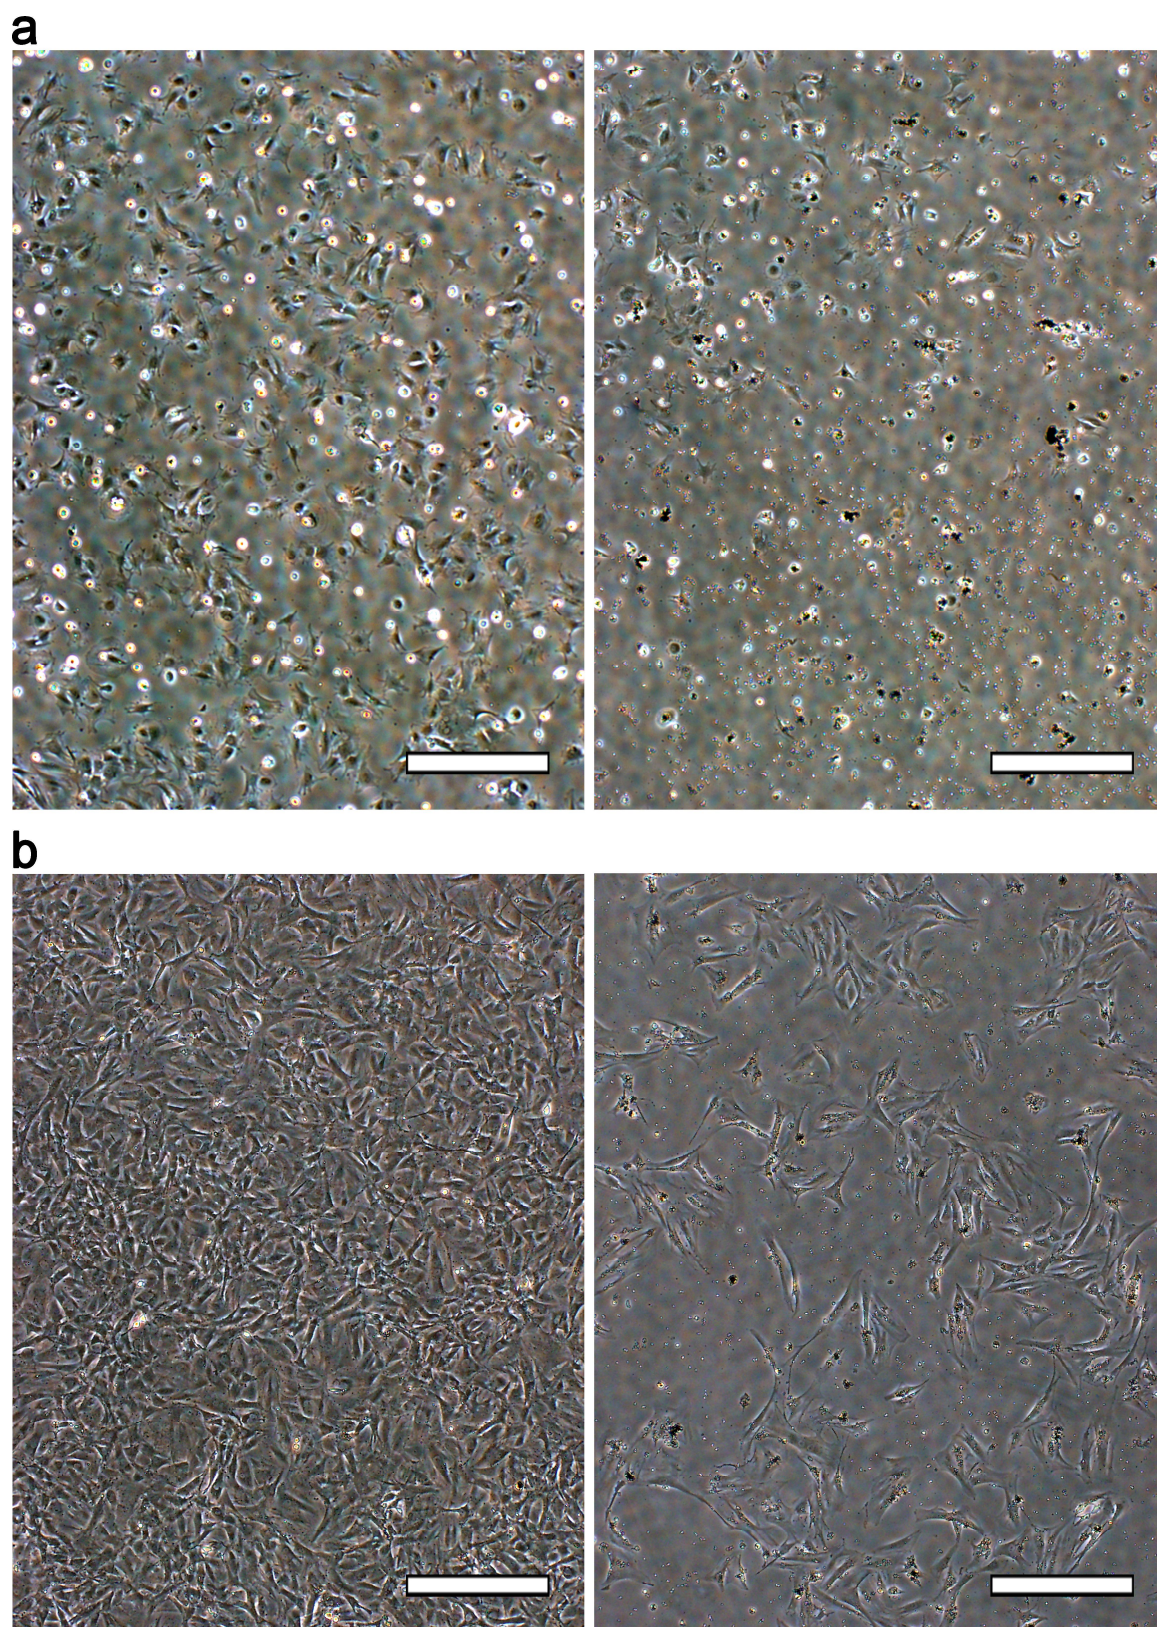

**Figure S4.** Morphology and population density of native VSMCs on CPA-150-coated PS dishes (i.e., PPs deposited at the average RF power ( $P_{av}$ ) of 150 W) cultured (a) for 24 h and (b) for 7 days. (a, b) Images on the left represent major parts of the CPA-150 sample with lower amount of microparticles and higher cell densities with normal cellular morphology. Images on the right show less occurring parts of the CPA-150 sample (a) with mostly dead or unattached cells 24 h after seeding and (b) with cells with enlarged morphology after 7 days of culture. Microphotographs were taken by an epifluorescence Olympus IX-71 microscope. The scale bar depicts 400  $\mu\text{m}$ .
